# Supplementary material
Source: PubMed Central journal article supplement (PMC5544387)
Supplement: mmc1.pdf [file mmc1.pdf]

**Supplemental Data**

**Mutations in *TRAPPC12* Manifest in Progressive  
Childhood Encephalopathy and Golgi Dysfunction**

**Miroslav P. Milev, Megan E. Grout, Djenann Saint-Dic, Yong-Han Hank Cheng, Ian A. Glass, Christopher J. Hale, David S. Hanna, Michael O. Dorschner, Keshika Prematilake, Avraham Shaag, Orly Elpeleg, Michael Sacher, Dan Doherty, and Simon Edvardson**

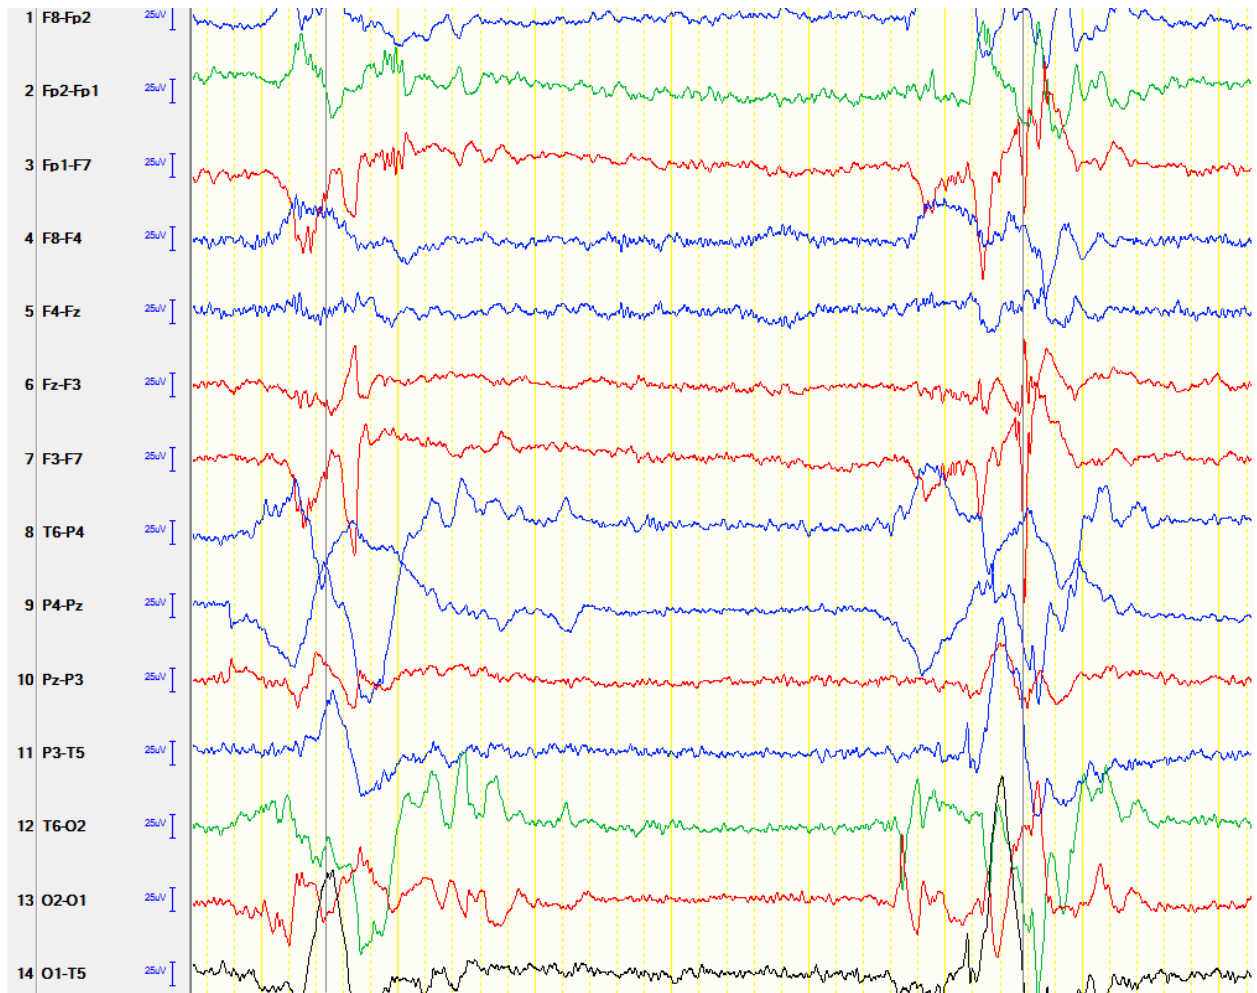

**Figure S1.** EEG at six months of age in 1:II-8 shows disorganized background activity with multifocal and generalized epileptiform activity consistent with hypsarrhythmia.

**Table S1. Candidate recessive genetic causes based on exome sequencing in families F4331 and UW336**

| <b>F4331 Family</b> |           |     |     |                 |                           |                 |          |       |       |    |             |  |
|---------------------|-----------|-----|-----|-----------------|---------------------------|-----------------|----------|-------|-------|----|-------------|--|
| Chr                 | bp (hg19) | ref | alt | gene            | cDNA change               | AA change       | ExAC MAF | GERP  | CADD  | MT | rs          |  |
| 2                   | 3391538   | CG  | C   | <i>TRAPPC12</i> | NM_016030.5:c.145del      | p.Glu49Argfs*14 | NR       | 5.00  | 16.18 | D  | NR          |  |
| 3                   | 126070876 | C   | A   | <i>KLF15</i>    | NM_014079.3:c.890G>T      | p.Gly297Val     | NR       | 4.25  | 10.94 | D  | NR          |  |
| 3                   | 126722227 | G   | A   | <i>PLXNA1</i>   | NM_032242.3:c.1432G>A     | p.Val478Ile     | 0.0008   | 4.43  | 17.75 | D  | rs199693063 |  |
| 3                   | 148601571 | C   | T   | <i>CPA3</i>     | NM_001870.2:c.950C>T      | p.Thr317Ile     | 0.0018   | 4.77  | 20.2  | D  | rs142588358 |  |
| 5                   | 56155651  | G   | A   | <i>MAP3K1</i>   | NM_005921.1:c.743G>A      | p.Arg248Gln     | 0.0002   | 5.72  | 20.5  | D  | rs201579608 |  |
| 7                   | 111926991 | T   | C   | <i>ZNF277</i>   | NM_021994.2:c.155T>C      | p.Leu52Ser      | 0.000008 | 1.97  | 13.74 | P  | rs764056350 |  |
| 8                   | 10467637  | T   | C   | <i>RP1L1</i>    | NM_178857.5:c.3971A>G     | p.Glu1324Gly    | NR       | -1.85 | 6.54  | P  | rs4240659   |  |
| 12                  | 49725054  | T   | C   | <i>TROAP</i>    | NM_005480.3:c.2156T>C     | p.Leu719Ser     | 0.0001   | 4.73  | 17.59 | P  | rs545155075 |  |
| 13                  | 52676340  | T   | C   | <i>NEK5</i>     | NM_199289.1:c.698A>G      | p.His233Arg     | 0.004    | -7.44 | 0.009 | P  | rs56369842  |  |
| 13                  | 52710344  | C   | T   | <i>NEK3</i>     | NM_001146099.1:c.1031G>A  | p.Arg344Gln     | 0.0016   | 0.85  | 8.65  | P  | rs74087069  |  |
| X                   | 48460322  | G   | A   | <i>WDR13</i>    | NM_017883.4:c.982G>A      | p.Val328Ile     | 0.0005   | 3.65  | 0.18  | P  | rs150193416 |  |
| X                   | 63409994  | G   | A   | <i>AMER1</i>    | NM_152424.3:c.3173C>T     | p.Pro1058Leu    | 0.00002  | 4.83  | 17.58 | D  | rs760083711 |  |
| X                   | 73641702  | C   | A   | <i>SLC16A2</i>  | NM_006517.4:c.230C>A      | p.Pro77His      | NR       | 2.24  | 12.49 | P  | NR          |  |
| X                   | 101139020 | T   | G   | <i>ZMAT1</i>    | NM_001011657.3:c.1379A>C  | p.Gln460Pro     | NR       | 3.22  | 13.25 | P  | NR          |  |
| X                   | 117758578 | G   | C   | <i>DOCK11</i>   | NM_144658.3:c.3548G>C     | p.Gly1183Ala    | 0.00001  | 5.53  | 6.79  | D  | rs370985549 |  |
| <b>UW336 Family</b> |           |     |     |                 |                           |                 |          |       |       |    |             |  |
| Chr                 | bp (hg19) | ref | alt | gene            | cDNA change               | AA change       | ExAC MAF | GERP  | CADD  | MT | rs          |  |
| 2                   | 3391754   | C   | CC  | <i>TRAPPC12</i> | NM_016030.5:c.360_361insC | p.Glu121Argfs*7 | NR       | 1.09  | 9.89  | D  | NR          |  |
| 2                   | 3482619   | C   | T   | <i>TRAPPC12</i> | NM_016030.5:c.1880C>T     | p.Ala627Val     | 0.000008 | 5.92  | 21.3  | D  | rs768950892 |  |
| 21                  | 37581084  | G   | A   | <i>DOPEY2</i>   | NM_005128.2:c.563G>A      | p.Ser188Asn     | 0.008263 | 4.11  | 20.2  | P  | rs142091518 |  |
| 21                  | 37597909  | C   | G   | <i>DOPEY2</i>   | NM_005128.2:c.1417C>G     | p.Pro473Ala     | 0.008141 | 5.05  | 17.66 | P  | rs138343054 |  |

alt=alternate base, bp=base pair position (hg19 reference genome), CADD=Combined Annotation Dependent Depletion version 1.0, Chr=Chromosome, D=Disease Causing per Mutation Taster, ExAC MAF=Exome Aggregation Consortium Minor Allele Frequency, GERP=Genomic Evolutionary Rate Profiling, NR=Not Reported, P=Polymorphism per Mutation Taster, ref=reference base, rs= Reference SNP cluster ID
